# Supplementary material
Source: publisher figshare collection journal article supplement (https://acs.figshare.com/ndownloader/files/17421938)
Supplement: Supplementary file 1 [file 17421938 › info.xml]

<presentation>
	<article>
		<title>Repurposing of tranilast for potential neuropathic pain treatment by inhibition of sepiapterin reductase in the BH4 pathway</title>
		<doi>10.1021/acsomega.9b01228</doi>
		<copyright>American Chemical Society</copyright>
		<narrator>Benjamin Moore</narrator>
		<contact>Barira Islam</contact>
		<contact-email>b.islam@hud.ac.uk</contact-email>
		<author-list>
			<author>Patrick C. McHugh</author>
		</author-list>
	</article>
	<slides height-width-ratio=".75">
		<slide audio-time="15">
			<subtitle/>
		</slide>
		<slide audio-time="58">
			<subtitle/>
		</slide>
		<slide audio-time="53">
			<subtitle/>
		</slide>
		<slide audio-time="75">
			<subtitle/>
		</slide>
		<slide audio-time="78">
			<subtitle/>
		</slide>
		<slide audio-time="61">
			<subtitle/>
		</slide>
		<slide audio-time="39">
			<subtitle/>
		</slide>
		<slide audio-time="53">
			<subtitle/>
		</slide>
	</slides>
	<audio duration="432"/>
</presentation>
